# Supplementary material for: Novel 8-Methoxycoumarin-3-Carboxamides with potent anticancer activity against liver cancer via targeting caspase-3/7 and β-tubulin polymerization
Source: PubMed Central journal article supplement (PMC10693084; doi:10.1186/s13065-023-01063-5), 2023-12-02
Supplement: 13065_2023_1063_MOESM1_ESM.pdf [file 13065_2023_1063_MOESM1_ESM.pdf]

## Supplementary Materials

### **Novel 8-Methoxycoumarin-3-Carboxamides with potent Anticancer activity against Liver Cancer *via* targeting caspase-3/7 and $\beta$ -tubulin polymerization**

Ahmad Alzamami <sup>1</sup>, Eman M. Radwan <sup>2</sup>, Eman Abo-Elabass <sup>3</sup>, Mohammed El Behery <sup>3</sup>, Hussah Abdullah Alshwyeh <sup>4,5</sup>, Ebtesam Al-Olayan<sup>6</sup>, Abdulmalik S. Altamimi <sup>7</sup>, Nashwah G M Attallah <sup>8</sup>, Najla Altwaijry <sup>9</sup>, Mariusz Jaremko <sup>10,\*</sup>, and Essa M. Saied <sup>11,12,\*</sup>

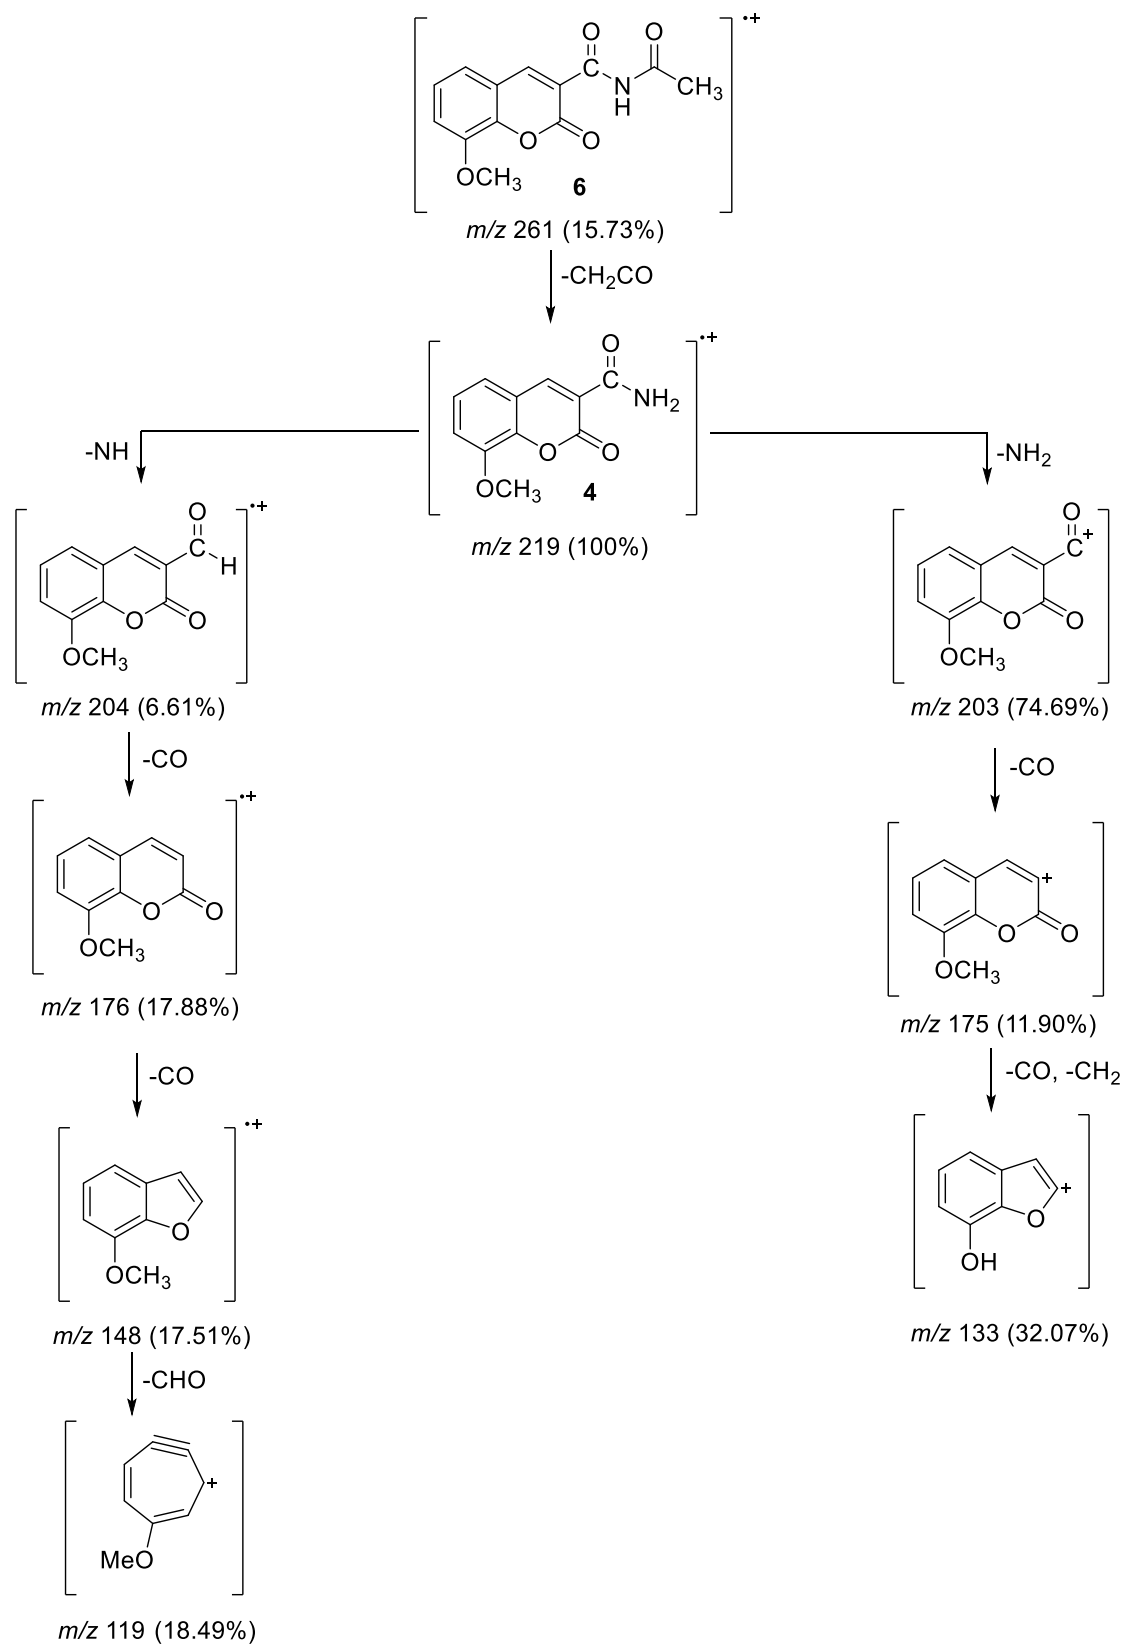

**Scheme S1: Main fragmentation pattern of compounds 4 and 6.**

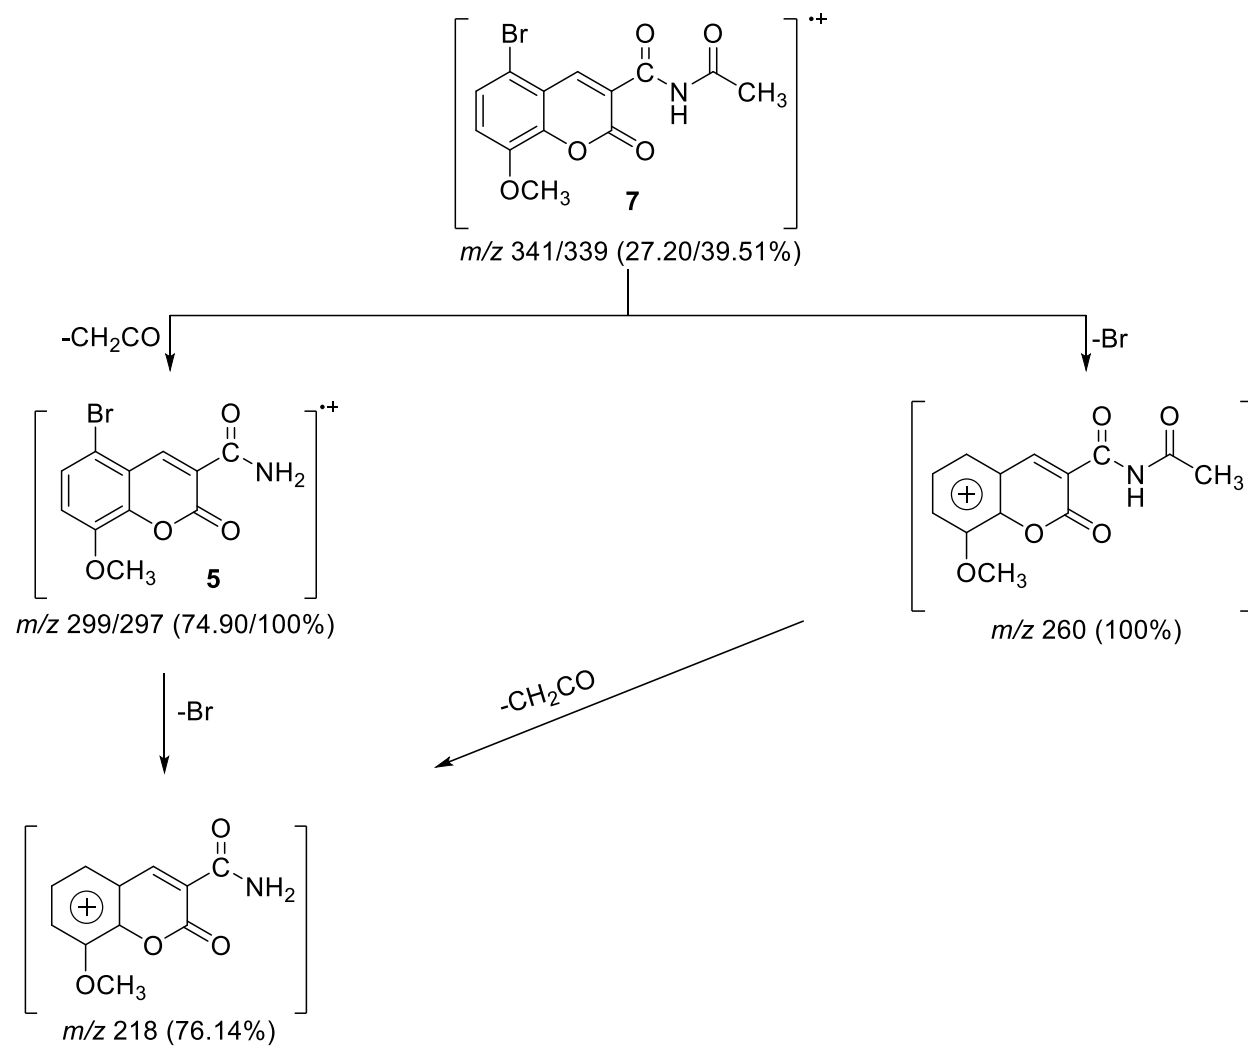

**Scheme S1: Main fragmentation pattern of compounds 5 and 7.**

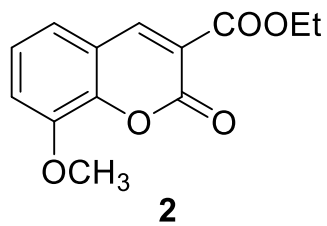

**Comp. 2**

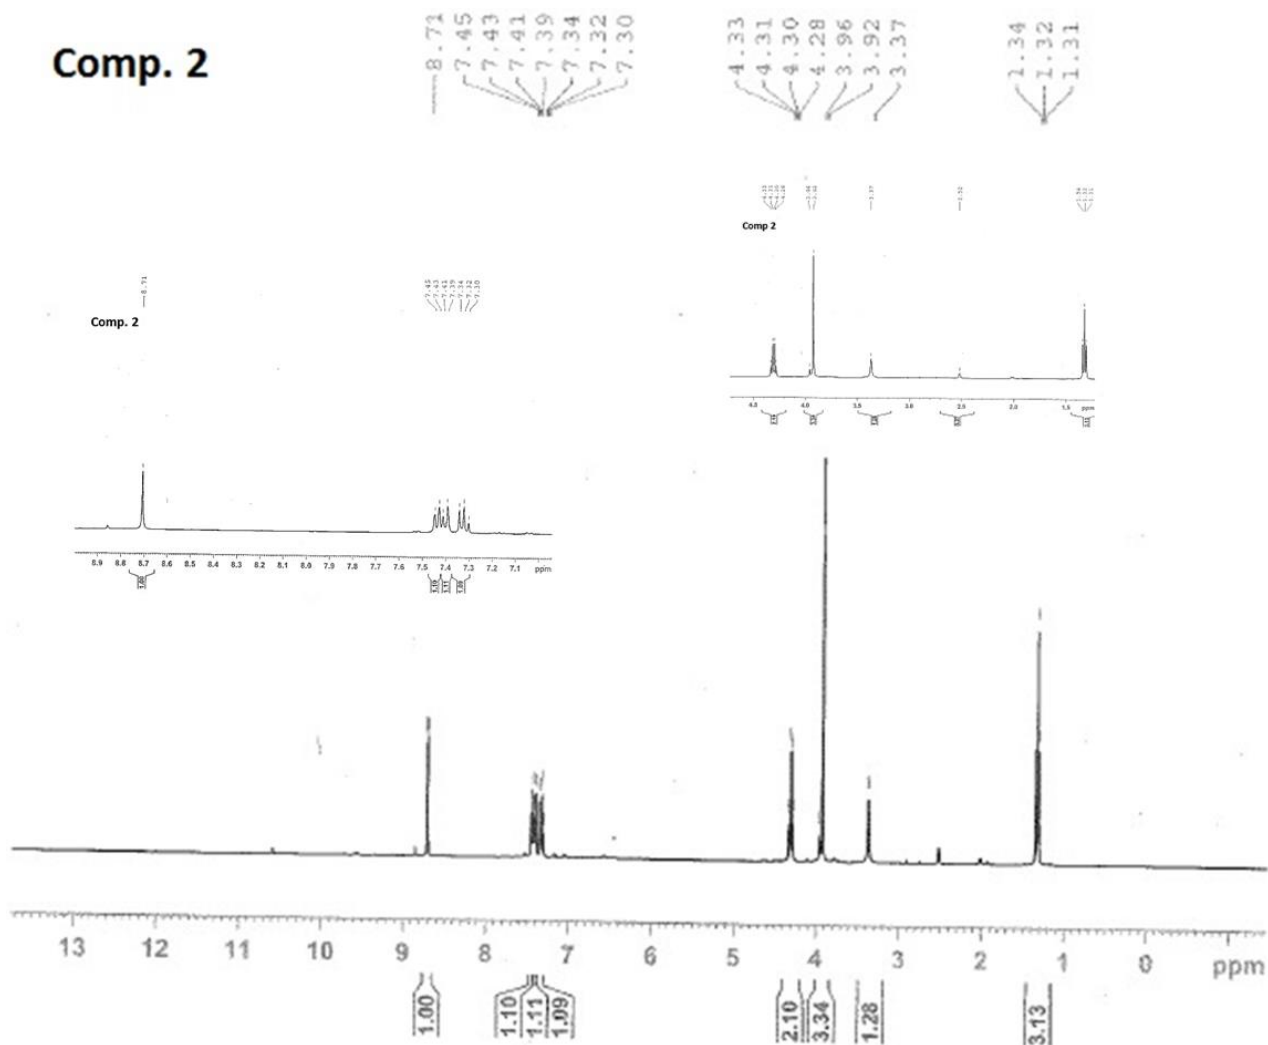

**Figure S1a. <sup>1</sup>H NMR spectra of compound 2**

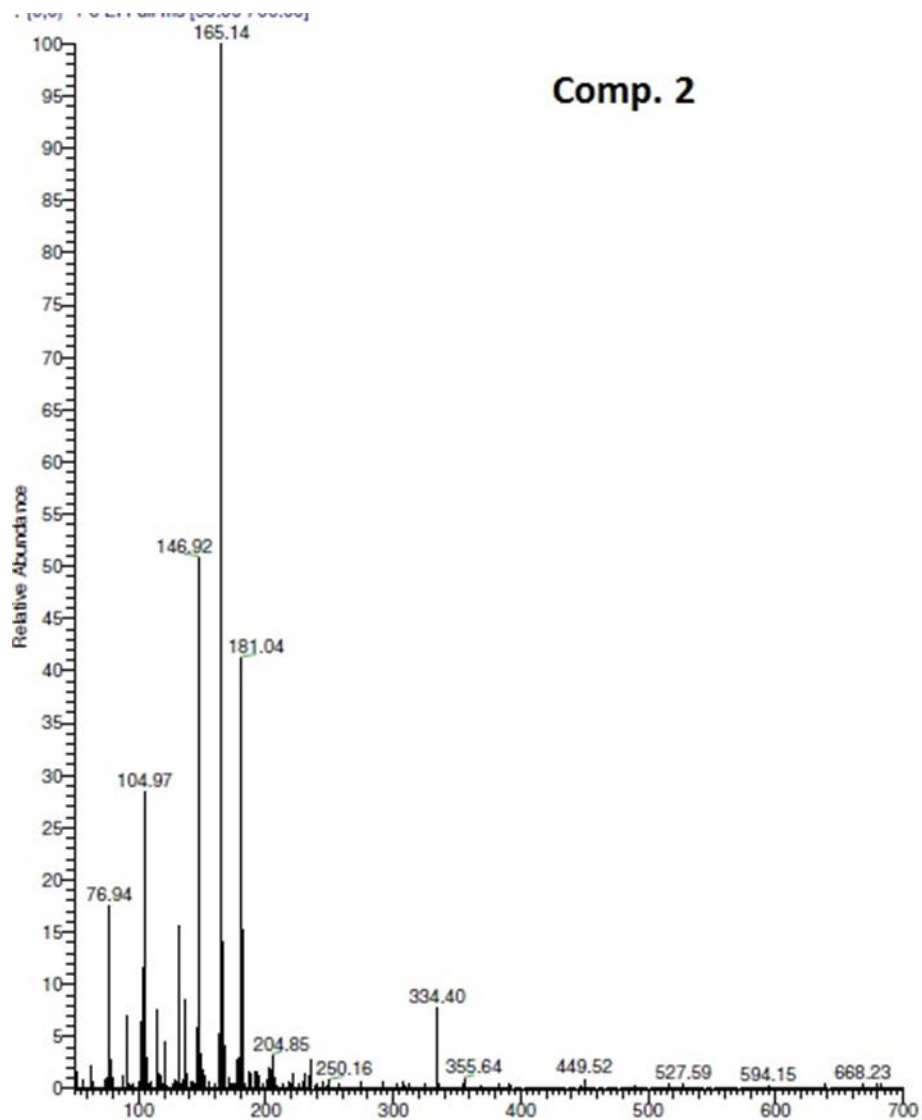

Figure S1b. Mass spectrum of compound 2.

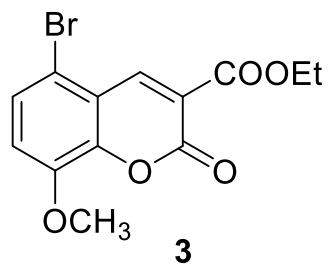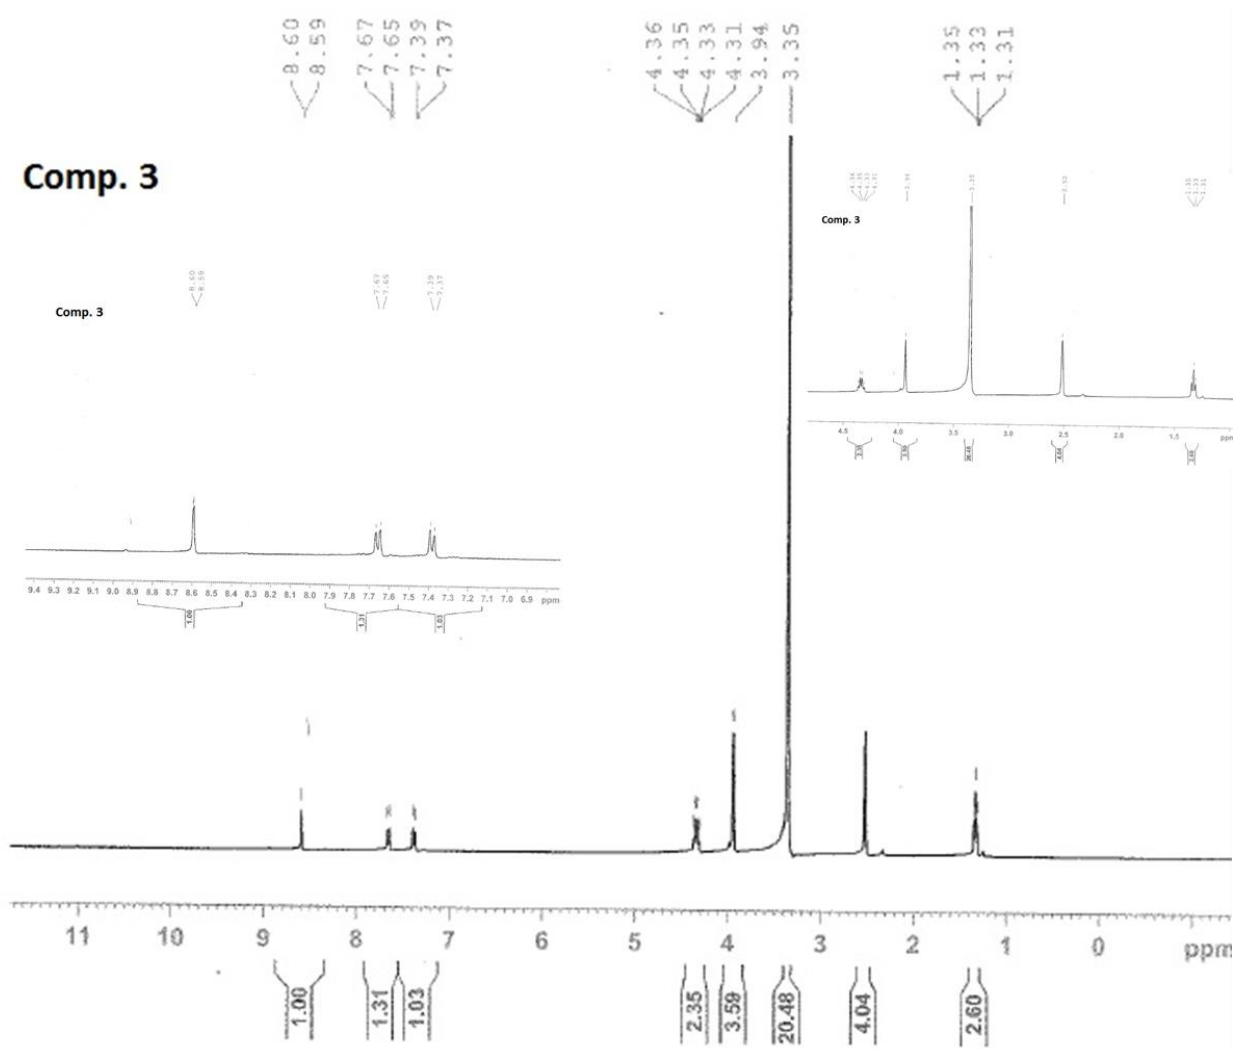

Figure S2a. <sup>1</sup>H NMR spectra of compound 3

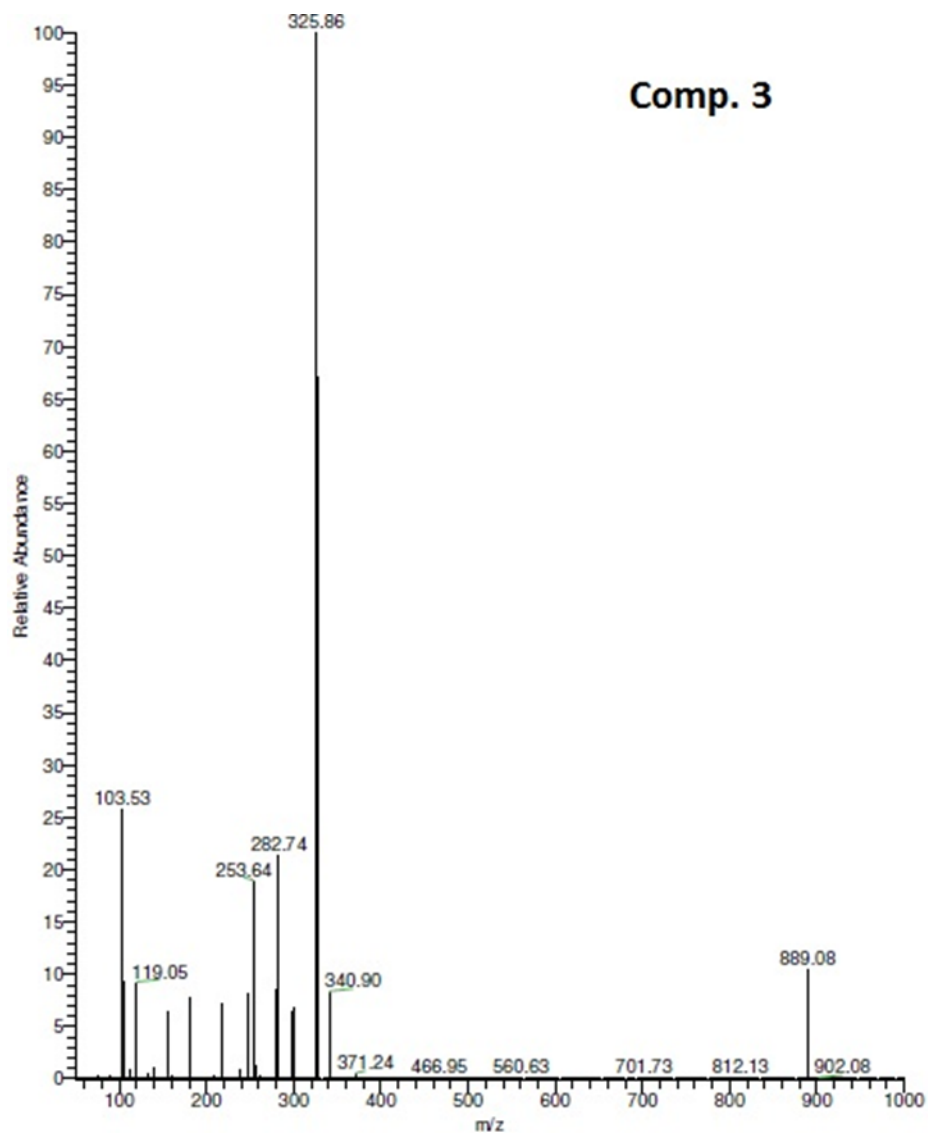

**Figure S2b. Mass spectrum of compound 3.**

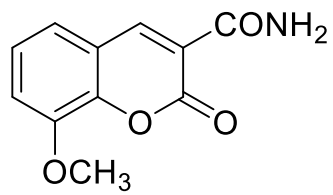

4

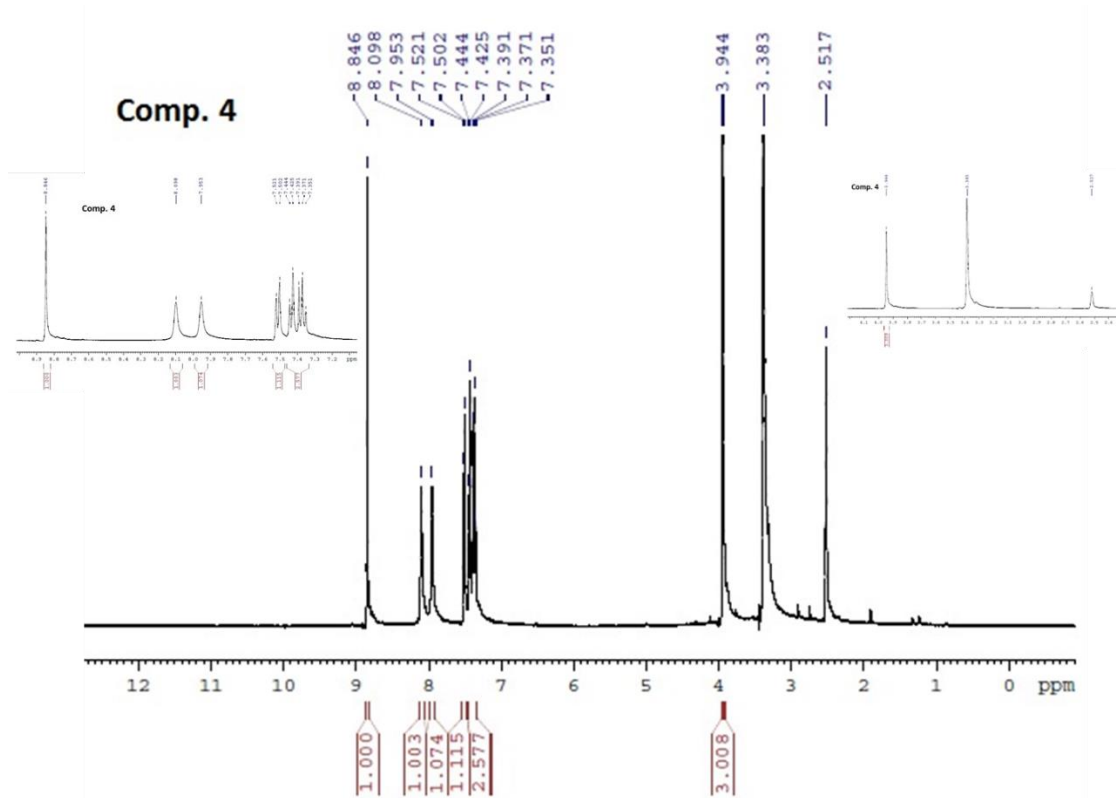



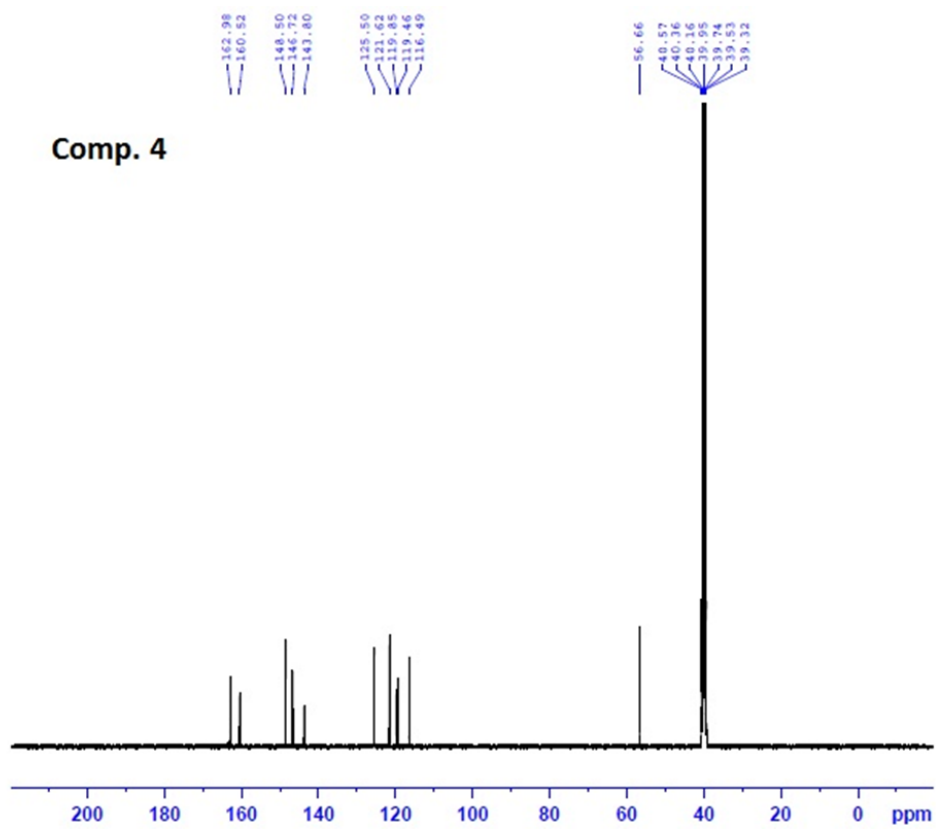

Figure S3a.  $^1\text{H}$  NMR and  $^{13}\text{C}$  NMR spectra of compound 4

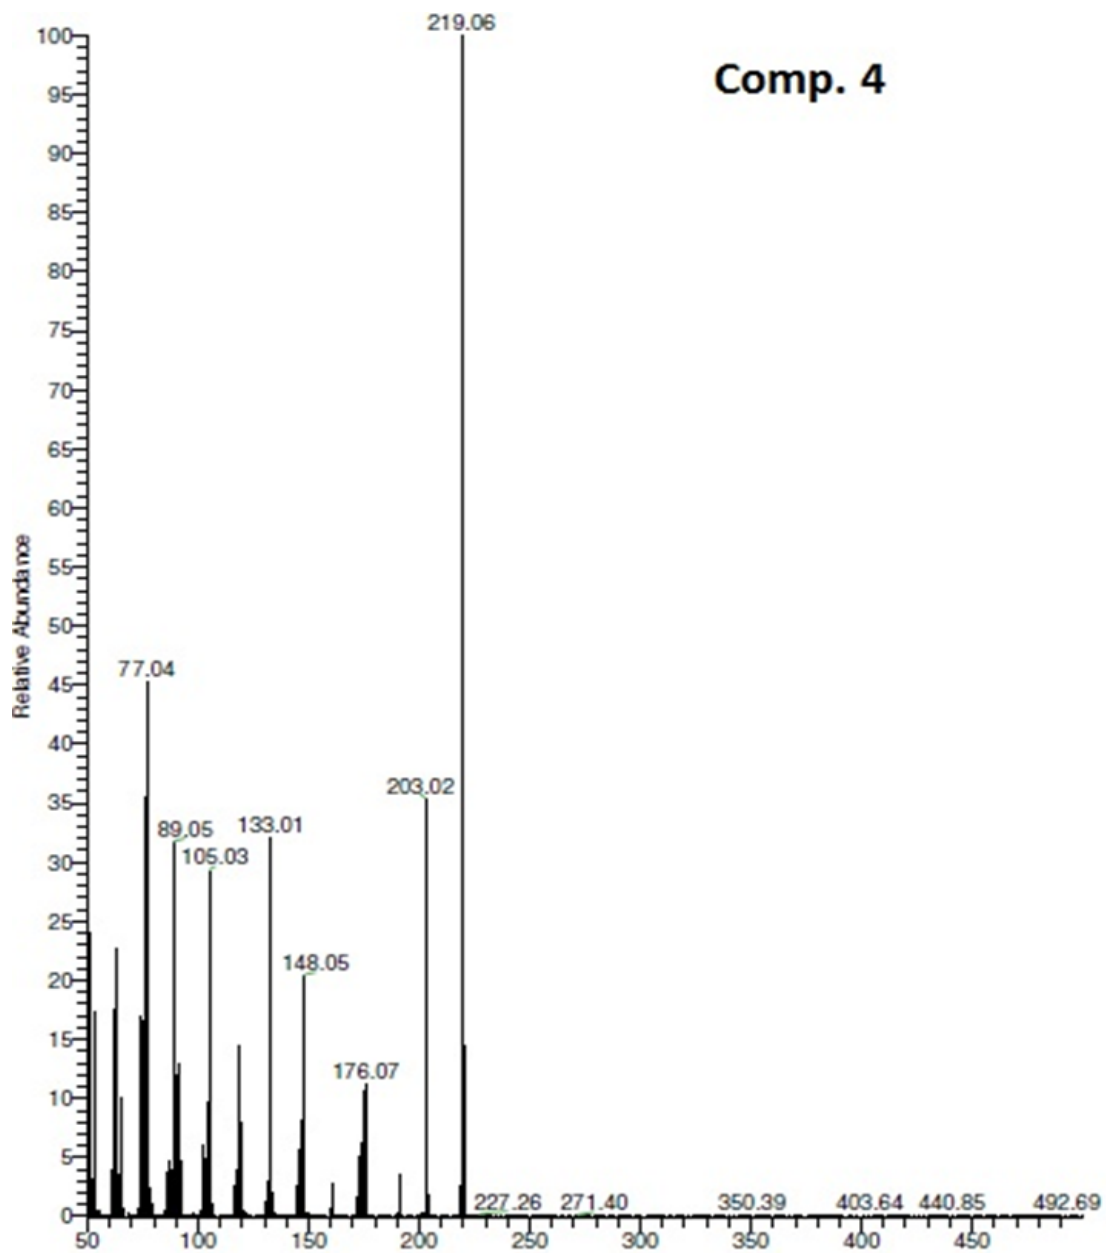

Figure S3b. Mass spectrum of compound 4.

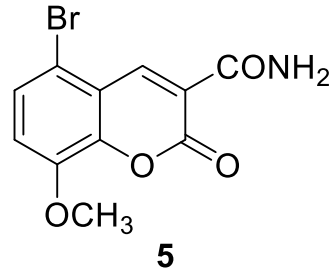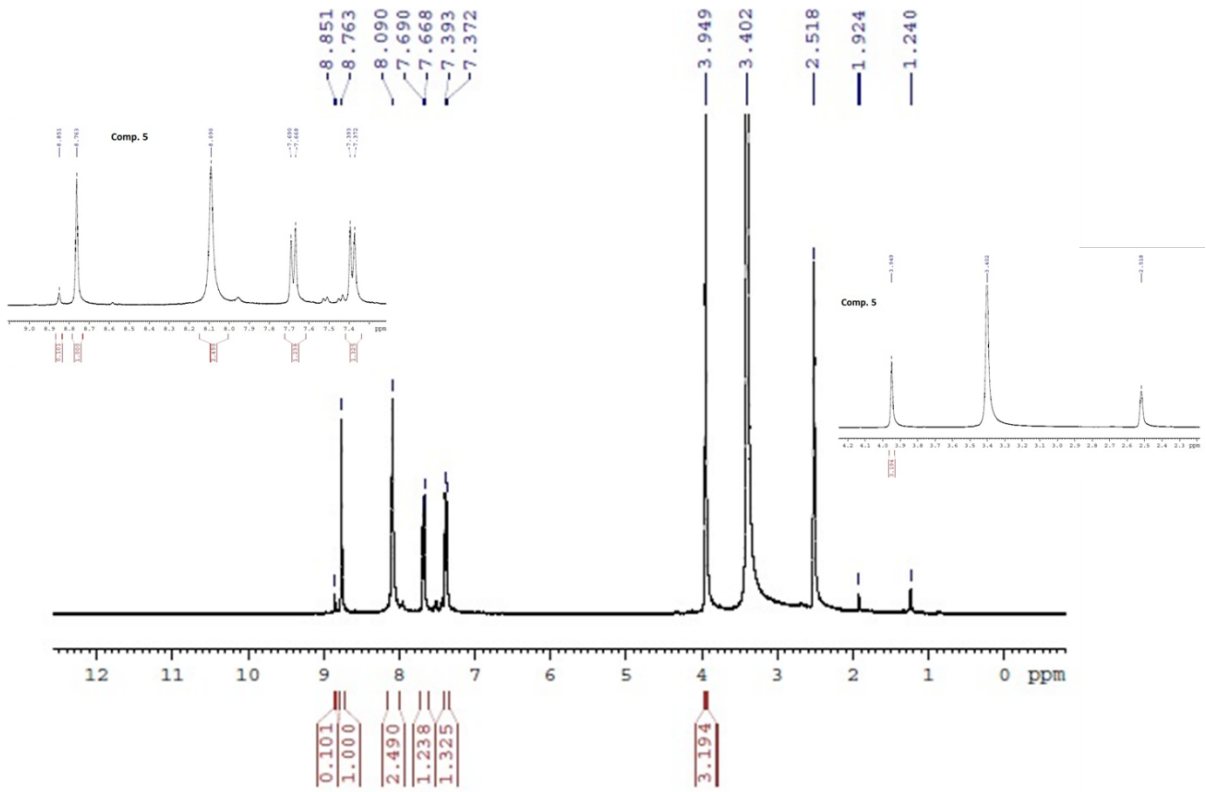

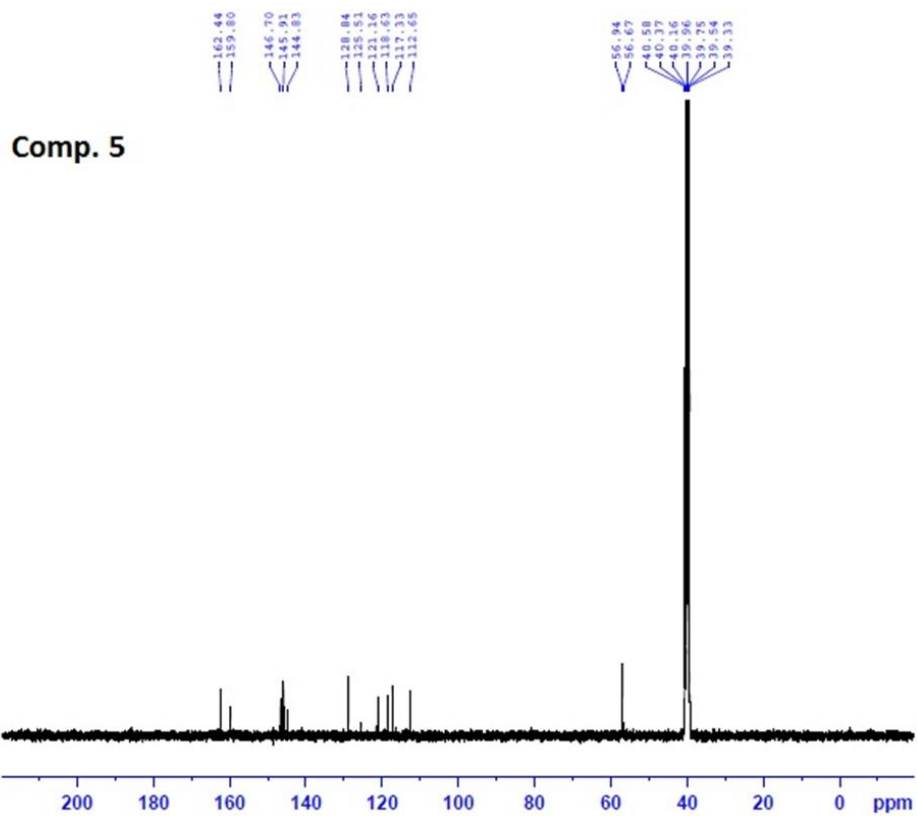

Figure S4a.  $^1\text{H}$  NMR and  $^{13}\text{C}$  NMR spectra of compound 5

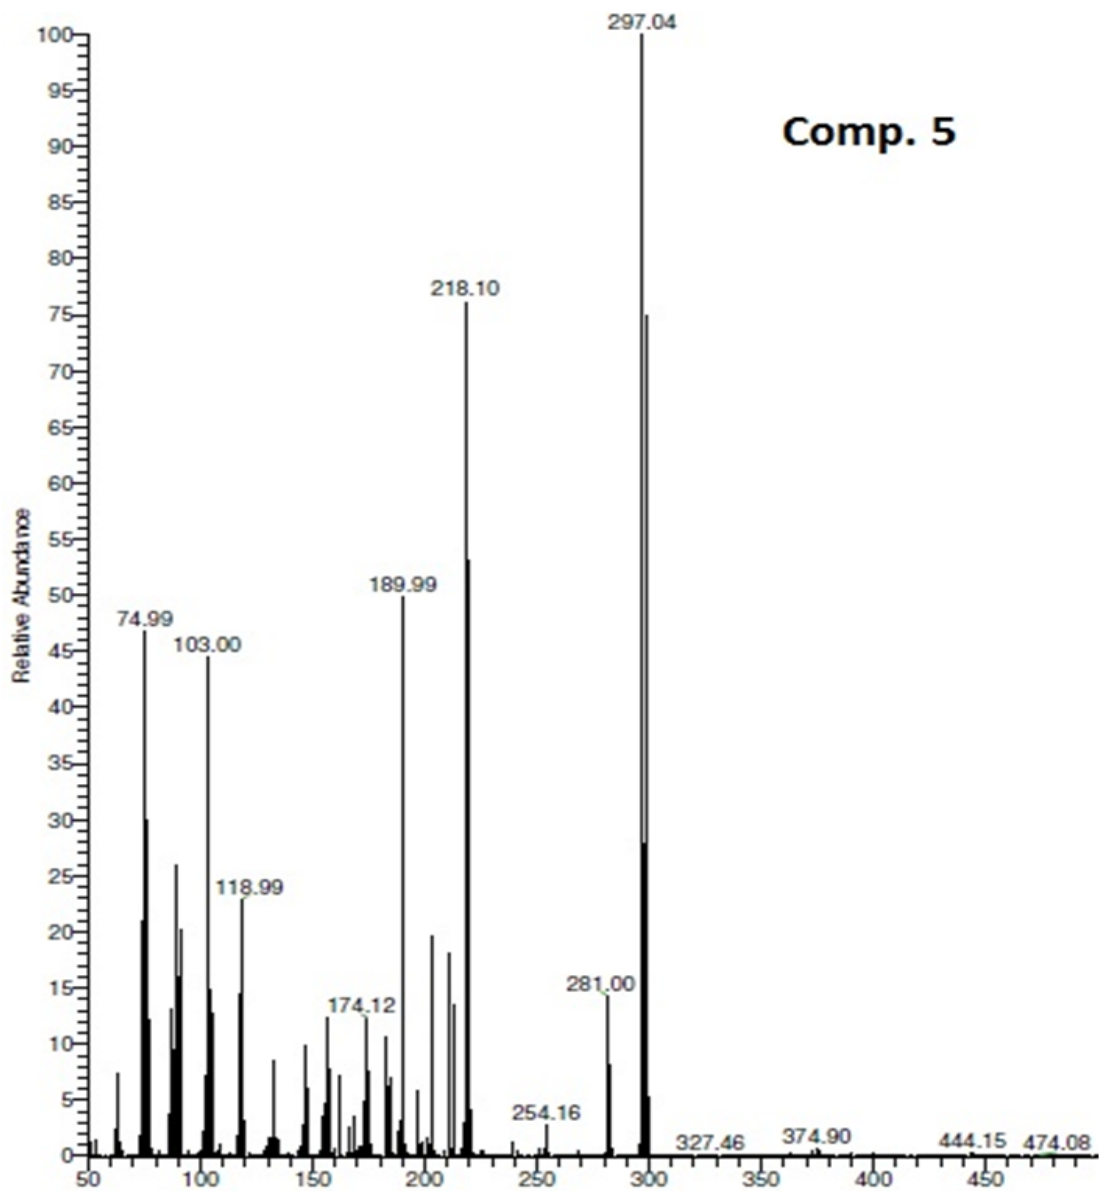

Figure S4b. Mass spectrum of compound 5.

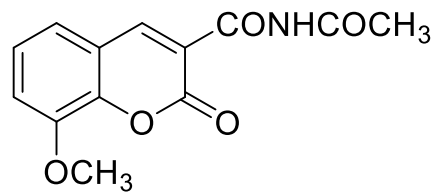

6

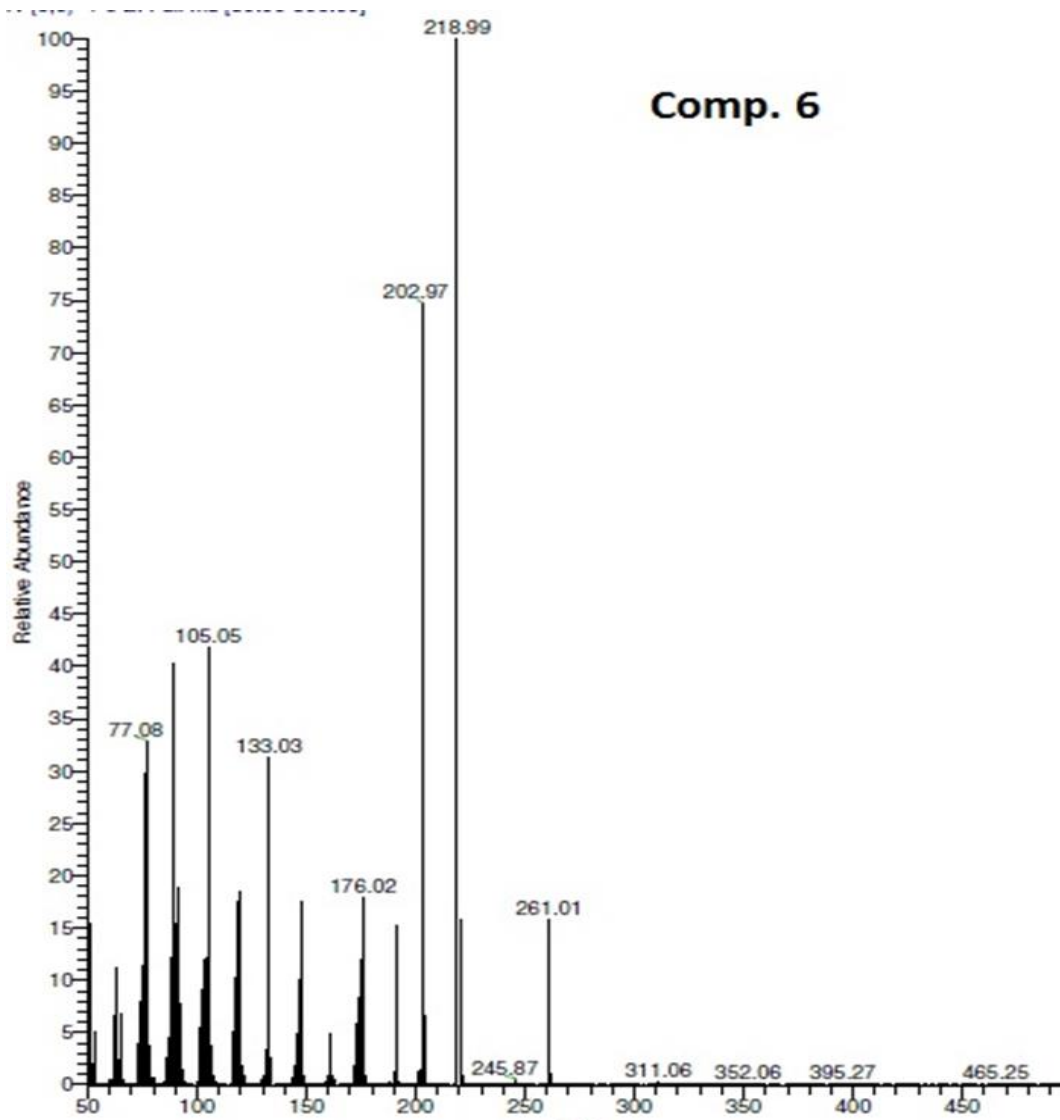

Figure S5. Mass spectrum of compound 6.

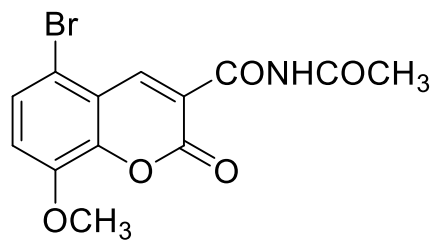

Comp. 7

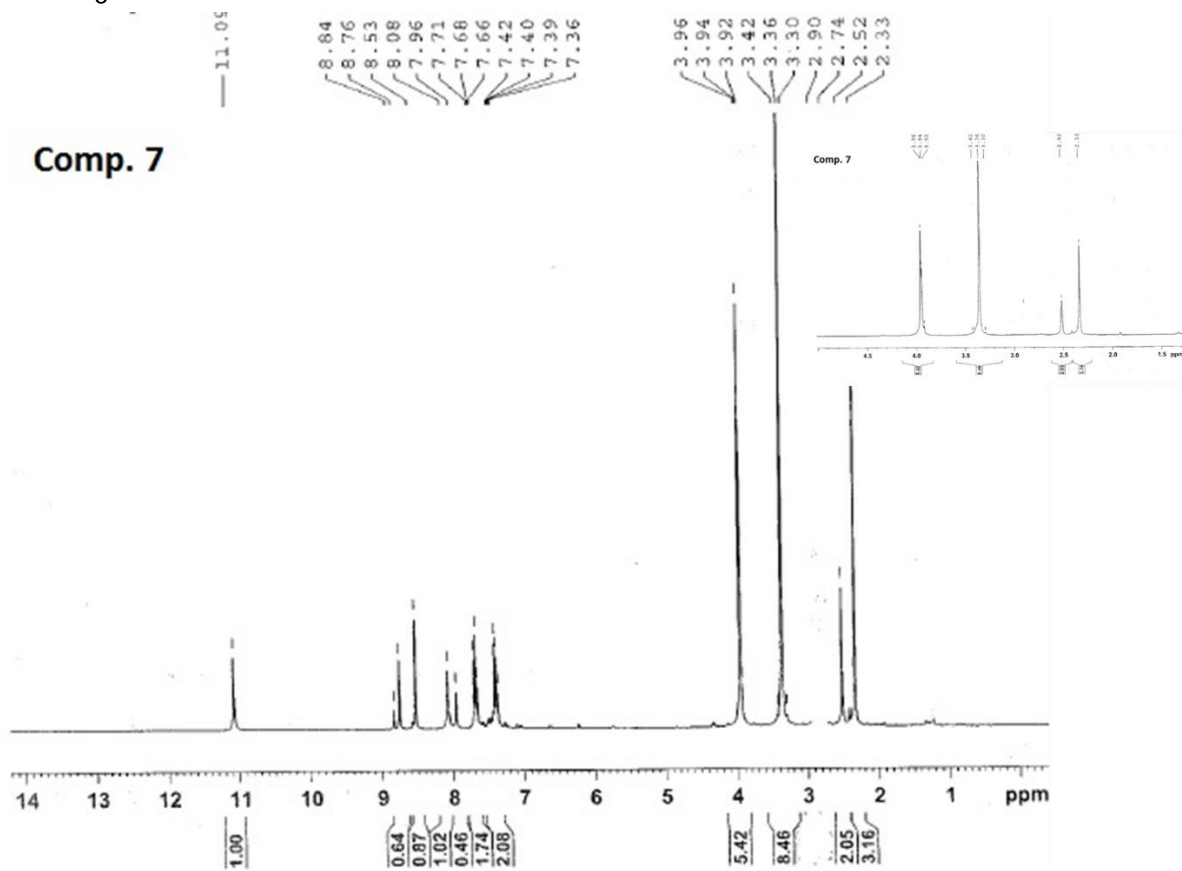

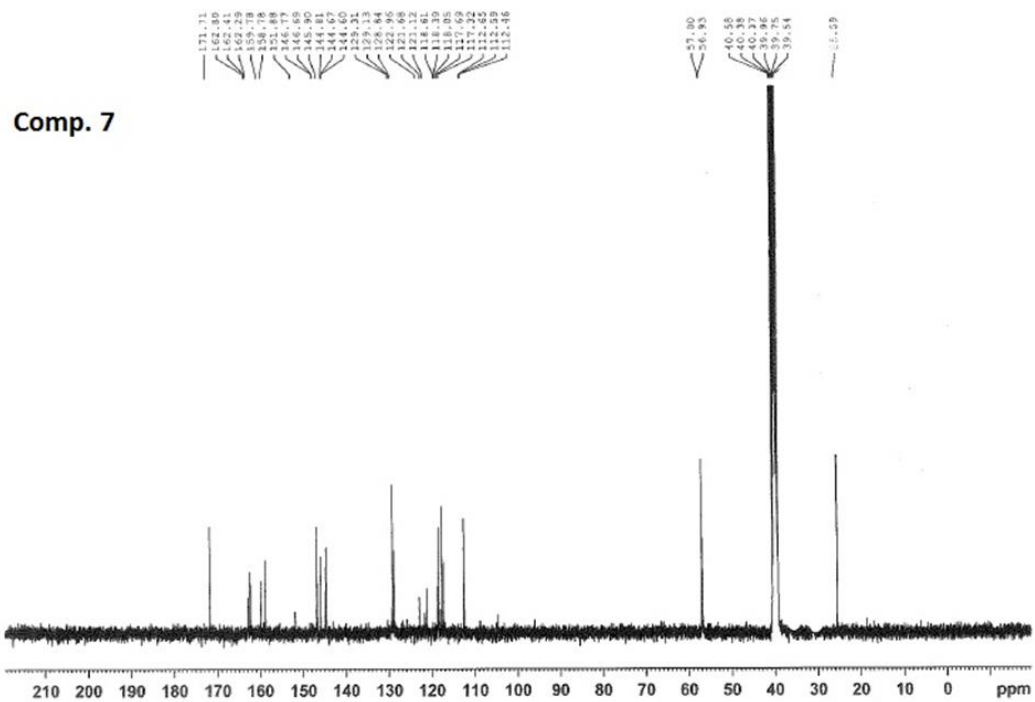

Figure S6a.  $^1\text{H}$  NMR and  $^{13}\text{C}$  NMR spectra of compound 7.



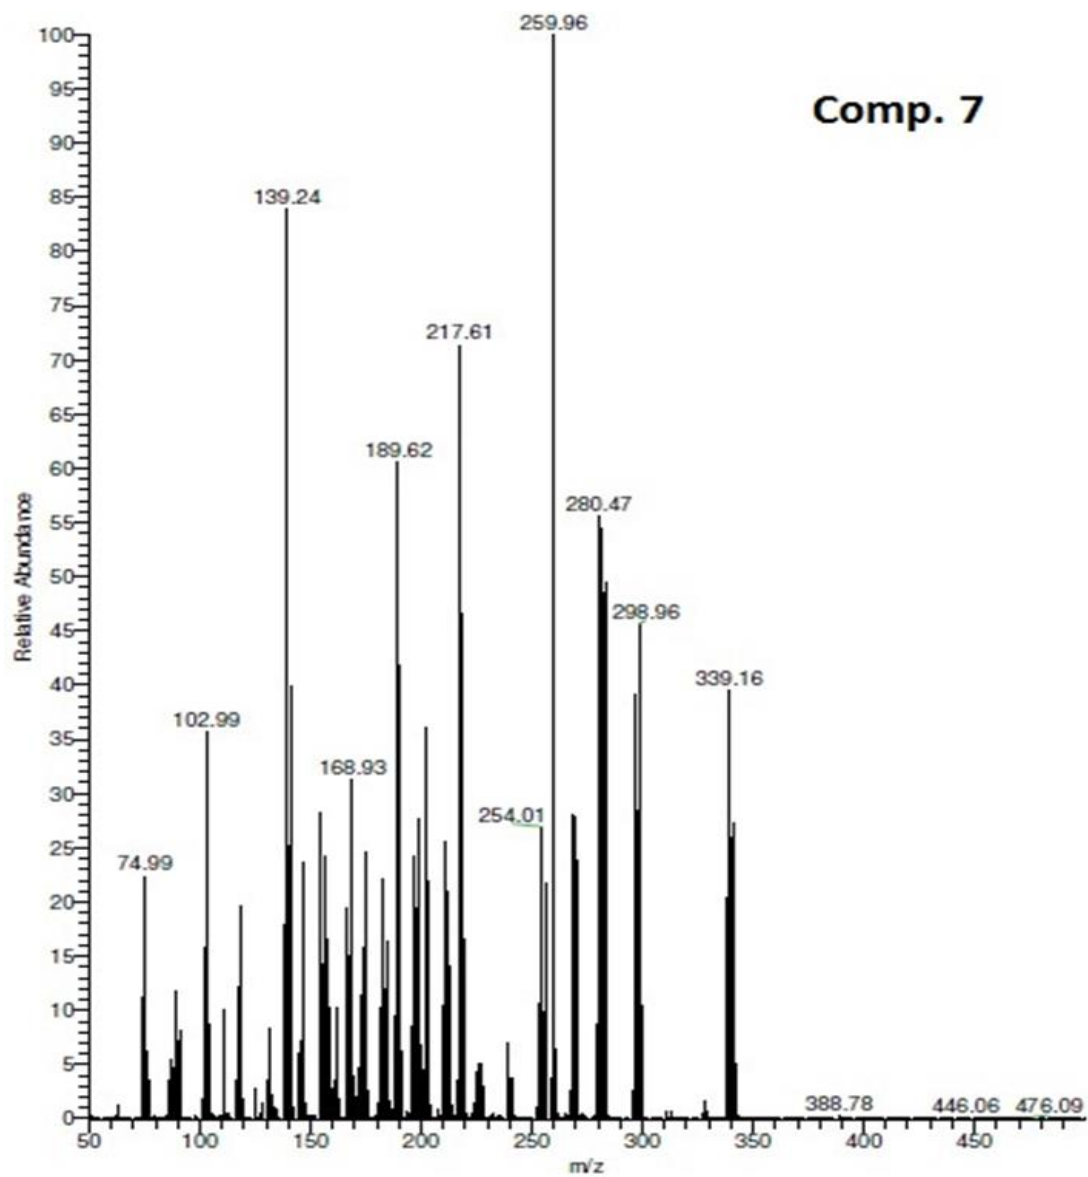

Figure S6b. Mass spectrum of compound 7.

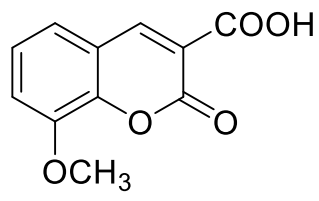

8

Comp. 8

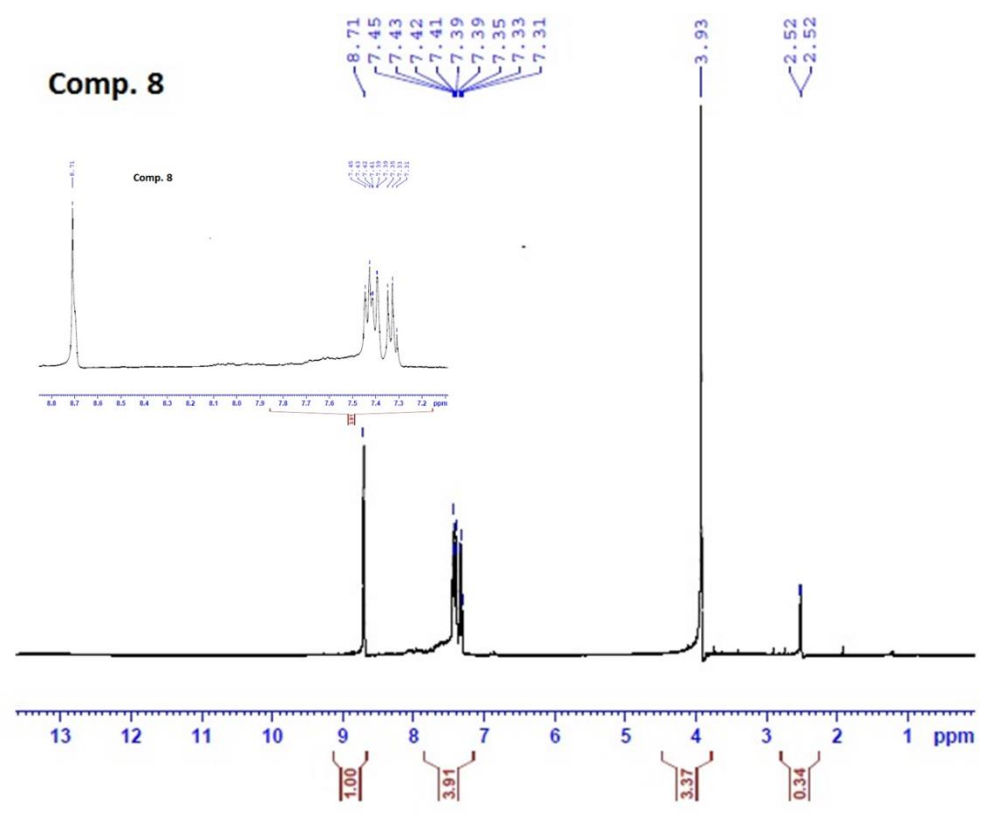

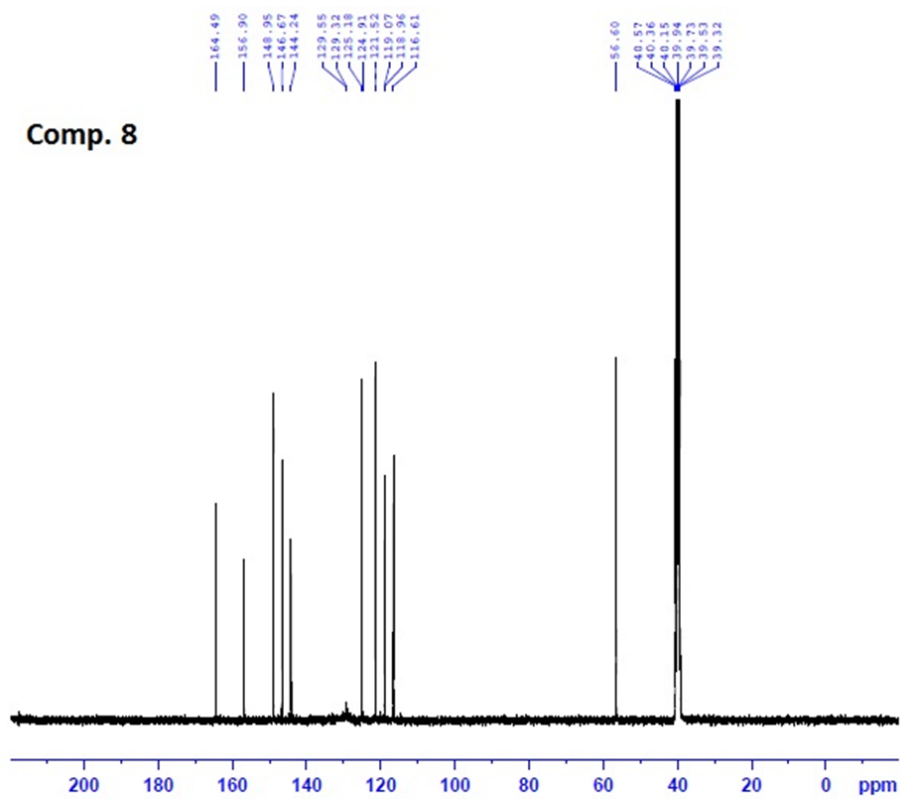

Figure S7a.  $^1\text{H}$  NMR and  $^{13}\text{C}$  NMR spectra of compound 8.

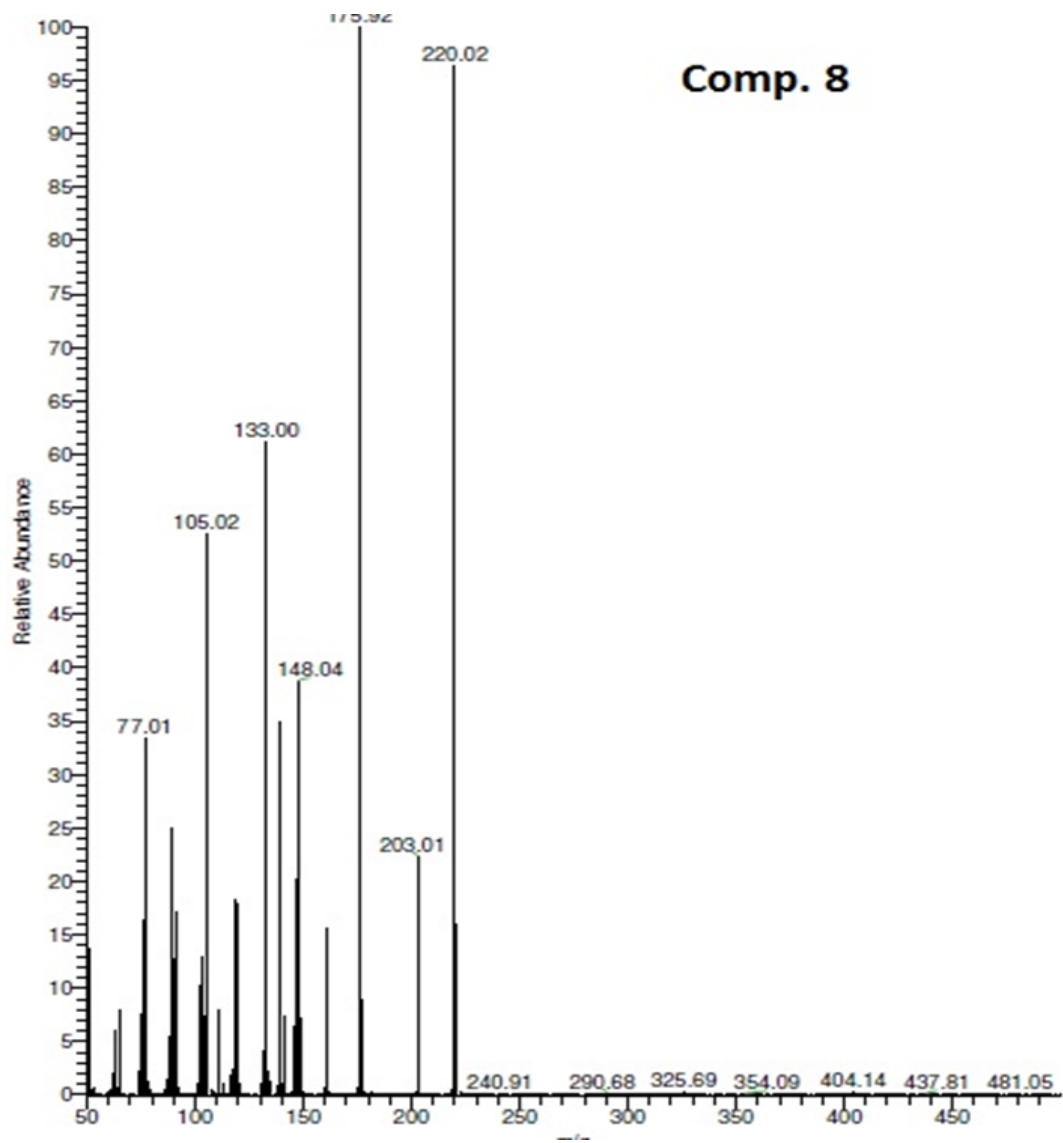

Figure S7b. Mass spectrum of compound 8.

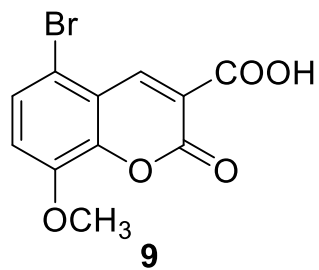

**Comp. 9**

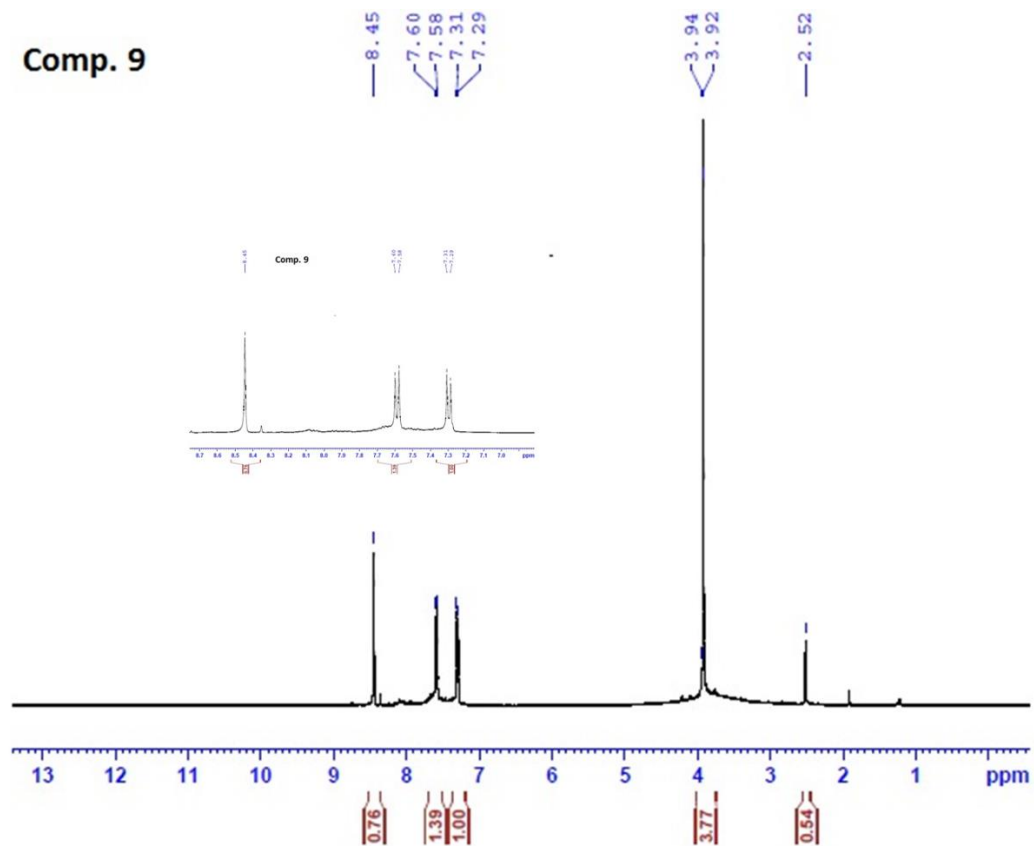

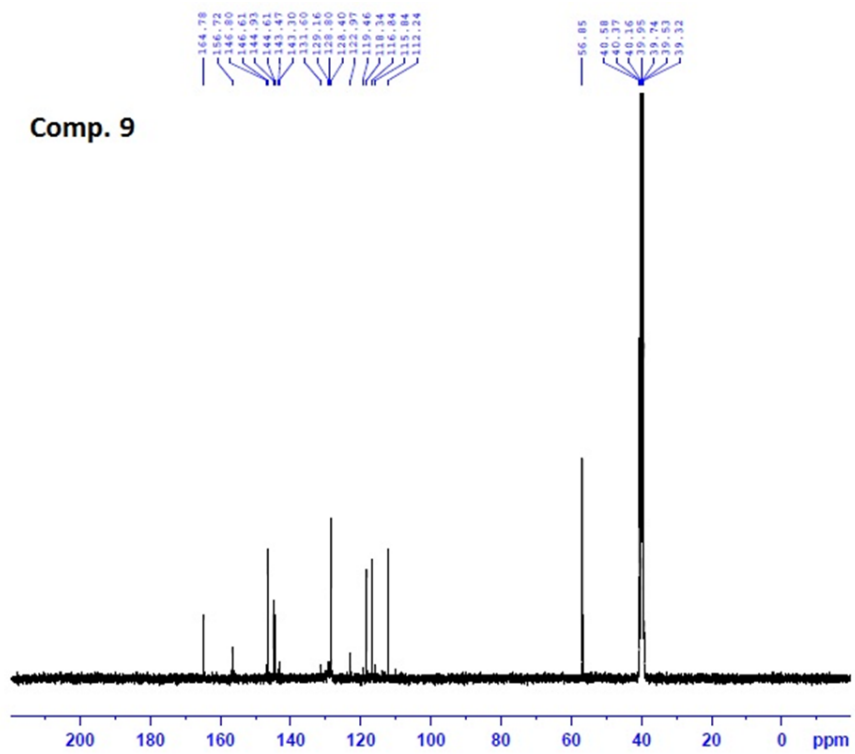

Figure S8a.  $^1\text{H}$  NMR and  $^{13}\text{C}$  NMR spectra of compound 9.

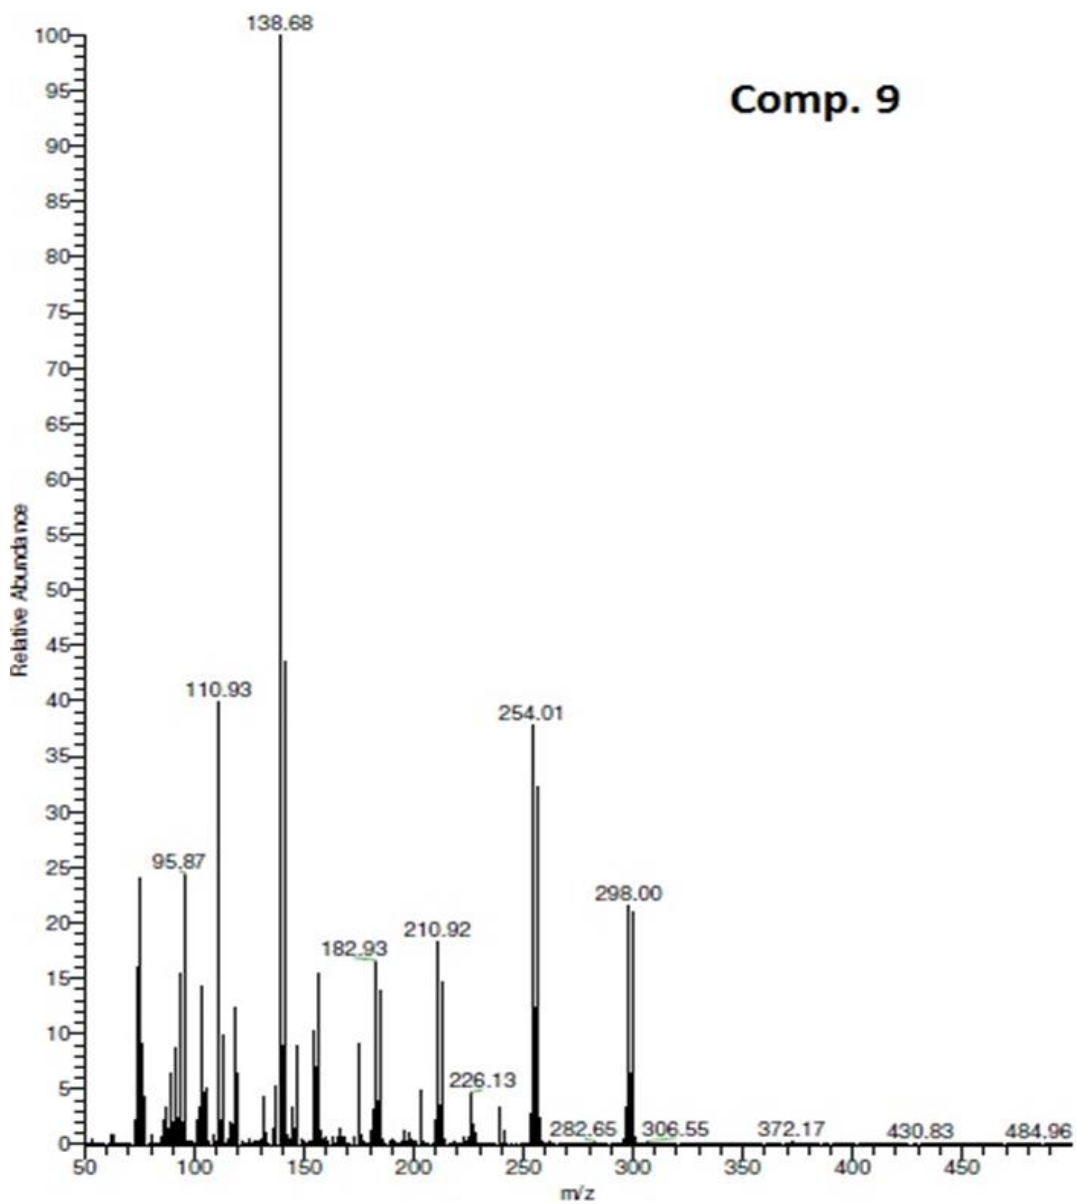

**Figure S8b. Mass spectrum of compound 9.**

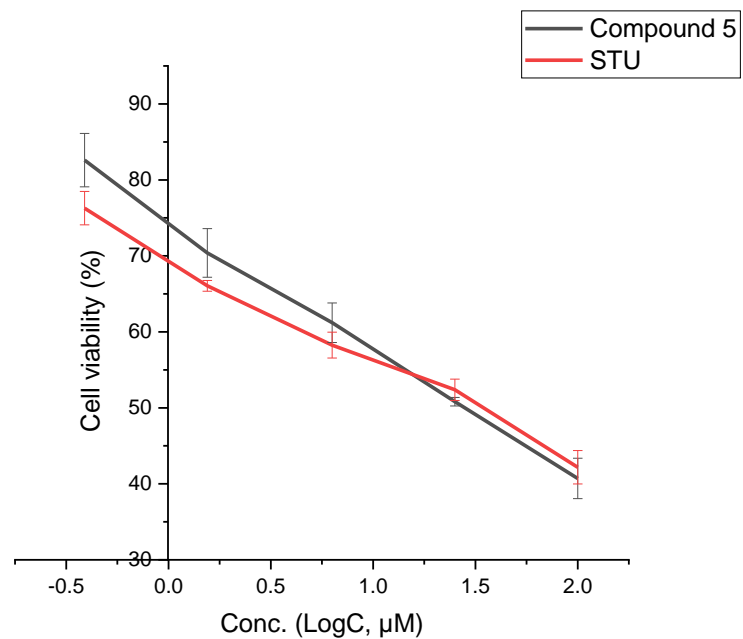

**Figure S9.** The dose-dependent cytotoxic activity of synthesized compound **5** toward WI 38 cells, as compared to STU. The presented data shows the mean  $\pm$  standard deviation of the mean obtained from at least three independent experiments.



**Table S1:** Cytotoxic evaluation of compounds 4-9, as compared to STU, against human liver carcinoma HepG2.

| <b>Concentration</b>           |                   | <b>HepG2-Cell Viability (%)</b> |                   |                   |                   |                   |                  |
|--------------------------------|-------------------|---------------------------------|-------------------|-------------------|-------------------|-------------------|------------------|
| <b>LogC, <math>\mu</math>M</b> | <b>Compound 4</b> | <b>Compound 5</b>               | <b>Compound 6</b> | <b>Compound 7</b> | <b>Compound 8</b> | <b>Compound 9</b> | <b>STU</b>       |
| <b>2</b>                       | 37.94 $\pm$ 2.75  | 34.02 $\pm$ 3.21                | 27.04 $\pm$ 2.87  | 45.03 $\pm$ 3.1   | 24.59 $\pm$ 1.84  | 42.17 $\pm$ 2.94  | 29.43 $\pm$ 3.14 |
| <b>1.4</b>                     | 47.29 $\pm$ 3.09  | 43.91 $\pm$ 2.73                | 37.53 $\pm$ 2.14  | 53.19 $\pm$ 2.87  | 35.26 $\pm$ 1.93  | 50.19 $\pm$ 3.07  | 39.57 $\pm$ 2.71 |
| <b>0.8</b>                     | 57.78 $\pm$ 2.46  | 52.05 $\pm$ 2.11                | 44.64 $\pm$ 1.98  | 60.52 $\pm$ 2.64  | 40.63 $\pm$ 1.66  | 55.34 $\pm$ 2.24  | 55.04 $\pm$ 1.96 |
| <b>0.19</b>                    | 65.8 $\pm$ 1.73   | 60.49 $\pm$ 1.84                | 54.47 $\pm$ 1.72  | 68.52 $\pm$ 2.36  | 46.68 $\pm$ 1.21  | 66.86 $\pm$ 1.86  | 62.49 $\pm$ 1.62 |
| <b>-0.41</b>                   | 75.81 $\pm$ 1.48  | 68.4 $\pm$ 1.52                 | 59.86 $\pm$ 1.33  | 77.18 $\pm$ 1.73  | 53.85 $\pm$ 1.34  | 73.23 $\pm$ 1.47  | 75.85 $\pm$ 1.26 |
